# Supplementary material for: Preconception reproductive tract infections status and adverse pregnancy outcomes: a population-based retrospective cohort study
Source: Springer Nature journal article supplement (doi:10.1186/s12884-022-04836-3), 2022-06-20
Supplement: MOESM1 [file 23183412]

**Figure S1** Subgroup analysis of spontaneous abortion in the women with preconception syphilis infection compared to the RTI-uninfected women

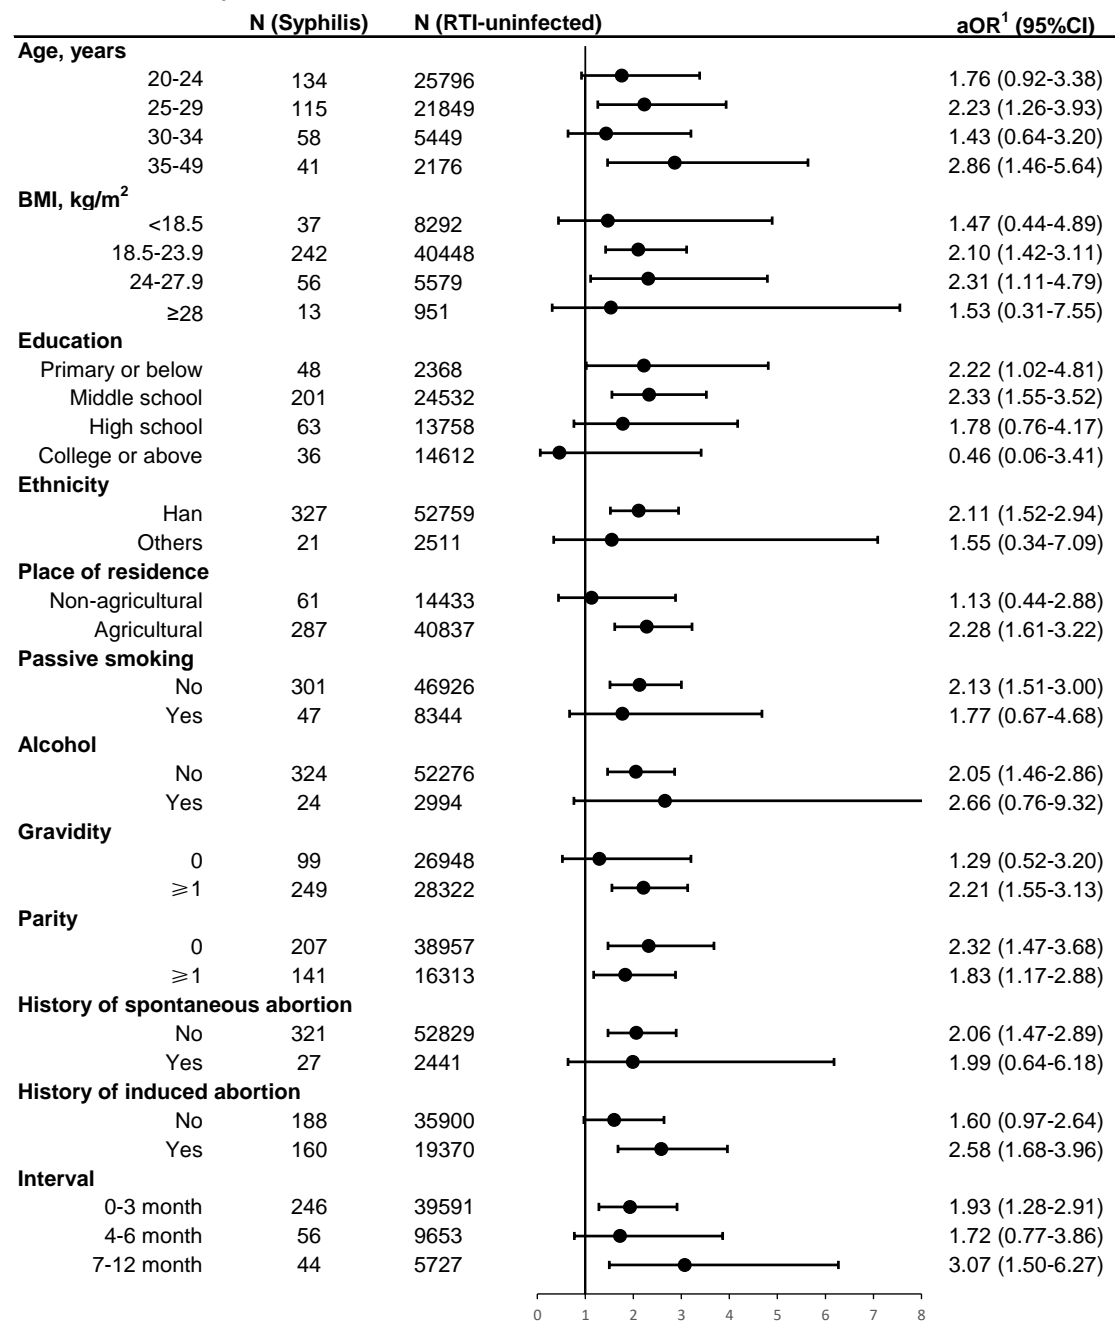

<sup>1</sup>aOR was adjusted for maternal age, maternal pregestational BMI, ethnicity, education level, occupation, place of residence, smoking, passive smoking, alcohol, parity, history of preterm birth, history of spontaneous abortion, history of induced abortion and hypertension.

Interval: the period between the date of RTIs testing and the date of the last menstrual period of pregnant women

**Figure S2** Subgroup analysis of preterm birth in the women with preconception syphilis infection compared to the RTI-uninfected women

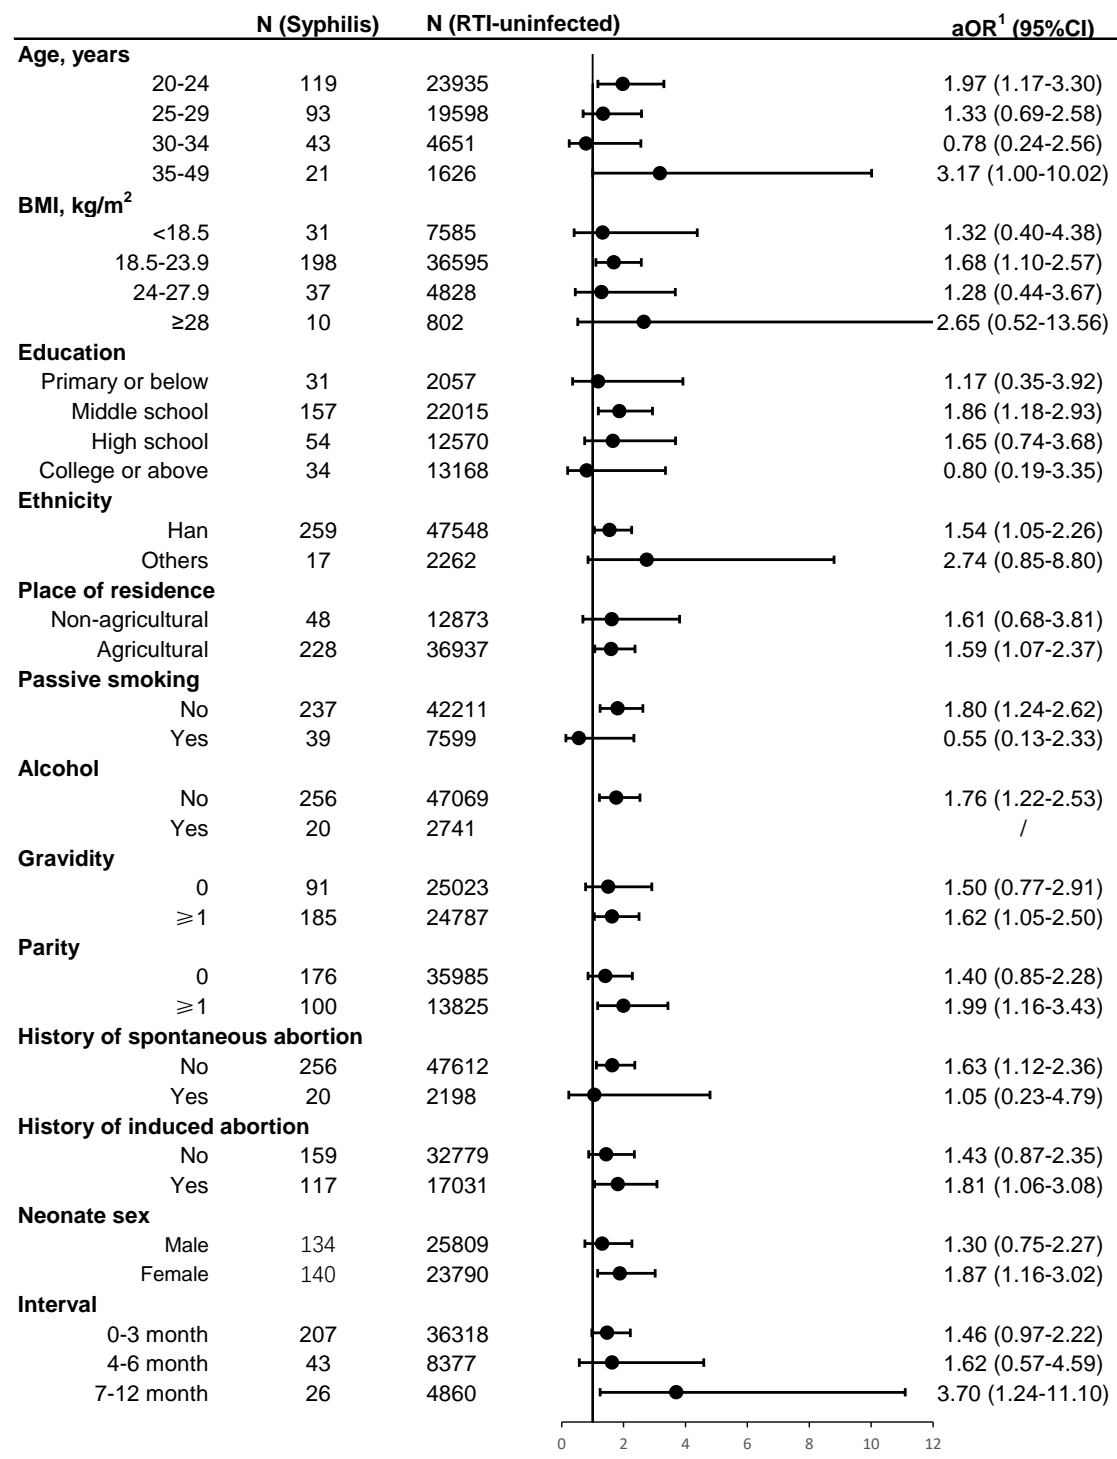

<sup>1</sup>aOR was adjusted for maternal age, maternal pregestational BMI, ethnicity, education level, occupation, place of residence, smoking, passive smoking, alcohol, parity, history of preterm birth, history of spontaneous abortion, history of induced abortion, hypertension, and neonate sex.

Interval: the period between the date of RTIs testing and the date of the last menstrual period of pregnant women
